# Supplementary material for: Tumor-derived lactate inhibit the efficacy of lenvatinib through regulating PD-L1 expression on neutrophil in hepatocellular carcinoma
Source: PubMed Central journal article supplement — J Immunother Cancer. 2021 Jun 24;9(6):e002305. doi: 10.1136/jitc-2020-002305 (PMC8231064; doi:10.1136/jitc-2020-002305), 2021-06-24
Supplement: jitc-2020-002305supp008.pdf [file jitc-2020-002305supp008.pdf]

**Table S1. Fluorescent-labeled antibodies**

| <b>Marker</b> | <b>Fluorescence</b> | <b>Item</b> | <b>Brand</b> |
|---------------|---------------------|-------------|--------------|
| CD45          | AF700               | 103128      | Biolegend    |
| CD4           | BV605               | 100548      | Biolegend    |
| CD8           | BV510               | 100752      | Biolegend    |
| CD11b         | APC                 | 101212      | Biolegend    |
| Ly6G          | BV650               | 740554      | BD           |
| F4-80         | PE-CY7              | 4323732     | Invitrogen   |
| PD-L1         | PE                  | 124308      | Biolegend    |
| PD-1          | BV786               | 744548      | BD           |
| CD152         | APC                 | 106309      | Biolegend    |
| CD366         | PE-CY7              | 119715      | Biolegend    |
| Ly6C          | PE-CF594            | 562728      | BD           |
| CD66b         | FITC                | 305104      | Biolegend    |
| LIVE/DEAD     | 7-ADD               | 559925      | BD           |
