# Supplementary material for: Tumor-derived lactate inhibit the efficacy of lenvatinib through regulating PD-L1 expression on neutrophil in hepatocellular carcinoma
Source: PubMed Central journal article supplement — J Immunother Cancer. 2021 Jun 24;9(6):e002305. doi: 10.1136/jitc-2020-002305 (PMC8231064; doi:10.1136/jitc-2020-002305), 2021-06-24
Supplement: jitc-2020-002305supp009.pdf [file jitc-2020-002305supp009.pdf]

**Table S2. The percentage of PD-L1+ neutrophils in HCC patients**

|           | Non-tumor | Tumor |
|-----------|-----------|-------|
| Patient1  | 13.18     | 21.51 |
| Patient2  | 6.77      | 43.9  |
| Patient3  | 9.74      | 11.25 |
| Patient4  | 31.99     | 54.29 |
| Patient5  | 3.22      | 12.58 |
| Patient6  | 3.89      | 20.57 |
| Patient7  | 6.67      | 14.67 |
| Patient8  | 12.21     | 14.74 |
| Patient9  | 43.21     | 77.25 |
| Patient10 | 84.52     | 85.69 |
| Patient11 | 9.6       | 10.09 |
| Patient12 | 46.24     | 40.13 |
| Patient13 | 7.12      | 13.16 |
