# Supplementary material for: Tumor-derived lactate inhibit the efficacy of lenvatinib through regulating PD-L1 expression on neutrophil in hepatocellular carcinoma
Source: PubMed Central journal article supplement — J Immunother Cancer. 2021 Jun 24;9(6):e002305. doi: 10.1136/jitc-2020-002305 (PMC8231064; doi:10.1136/jitc-2020-002305), 2021-06-24
Supplement: jitc-2020-002305supp010.pdf [file jitc-2020-002305supp010.pdf]

**Table S3. List of the sequences of the primers**

| <b>Name</b>  | <b>Primer</b>                                   |
|--------------|-------------------------------------------------|
| TNF $\alpha$ | CCTCTCTCTAATCAGCCCTCTG<br>GAGGACCTGGGAGTAGATGAG |
| ICAM-1       | ATGCCAGACATCTGTGTCC<br>GGGTCTCTATGCCCAACAA      |
| FAS          | TCTGGTTCTTACGTCTGTTGC<br>CTGTGCAGTCCCTAGCTTTCC  |
| Arginase     | GTGGAACTTGCATGGACAAC<br>AATCCTGGCACATCGGGAATC   |
| CCL2         | CAGCCAGATGCAATCAATGCC<br>TGGAATCCTGAACCCACTTCT  |
| CCL5         | CCAGCAGTCGTCTTTGTCAC<br>CTCTGGGTTGGCACACACTT    |
| ACTB         | CATGTACGTTGCTATCCAGGC<br>CTCCTTAATGTCACGCACGAT  |
