# Supplementary material for: Tumor-derived lactate inhibit the efficacy of lenvatinib through regulating PD-L1 expression on neutrophil in hepatocellular carcinoma
Source: PubMed Central journal article supplement — J Immunother Cancer. 2021 Jun 24;9(6):e002305. doi: 10.1136/jitc-2020-002305 (PMC8231064; doi:10.1136/jitc-2020-002305), 2021-06-24
Supplement: jitc-2020-002305supp011.pdf [file jitc-2020-002305supp011.pdf]

**Table S4. Nonsteroidal anti-inflammatory drugs**

| No. | CAS         | CAT   | NAME              |
|-----|-------------|-------|-------------------|
| 1   | 50-78-2     | T0005 | Aspirin           |
| 2   | 103-90-2    | T0065 | Acetaminophen     |
| 3   | 53-86-1     | T0458 | Indometacin       |
| 4   | 38194-50-2  | T0459 | Sulindac          |
| 5   | 15307-86-5  | T0196 | Diclofenac        |
| 6   | 15687-27-1  | T1394 | Ibuprofen         |
| 7   | 22204-53-1  | T1582 | Naproxen          |
| 8   | 5104-49-4   | T0291 | Flurbiprofen      |
| 9   | 68767-14-6  | T0463 | Loxoprofen        |
| 10  | 50-33-9     | T1432 | Phenylbutazone    |
| 11  | 42924-53-8  | T1258 | Nabumetone        |
| 12  | 36322-90-4  | T0758 | Piroxicam         |
| 13  | 41340-25-4  | T1002 | <b>Etodolac</b>   |
| 14  | 71125-38-7  | T0826 | <b>Meloxicam</b>  |
| 15  | 169590-42-5 | T0466 | <b>Celecoxib</b>  |
| 16  | 162011-90-7 | T1185 | <b>Rofecoxib</b>  |
| 17  | 51803-78-2  | T1133 | <b>Nimesulide</b> |

■ Non-selective

■ Selective
