# Supplementary figures and images for: Tumor-derived lactate inhibit the efficacy of lenvatinib through regulating PD-L1 expression on neutrophil in hepatocellular carcinoma
Source: PubMed Central journal article supplement — J Immunother Cancer. 2021 Jun 24;9(6):e002305. doi: 10.1136/jitc-2020-002305 (PMC8231064; doi:10.1136/jitc-2020-002305), 2021-06-24

## Figure S1

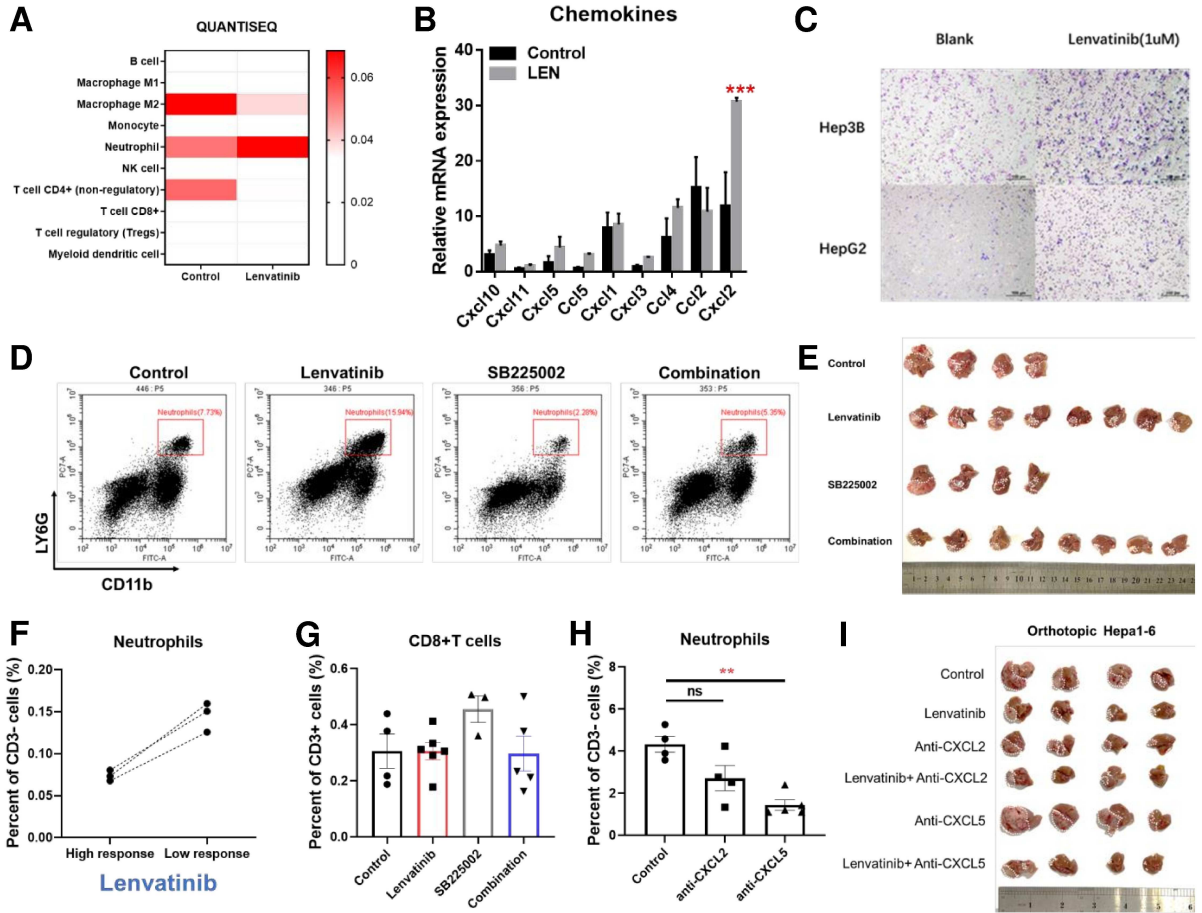

Supplement: jitc-2020-002305supp001.pdf [file jitc-2020-002305supp001.pdf]

**Figure S2**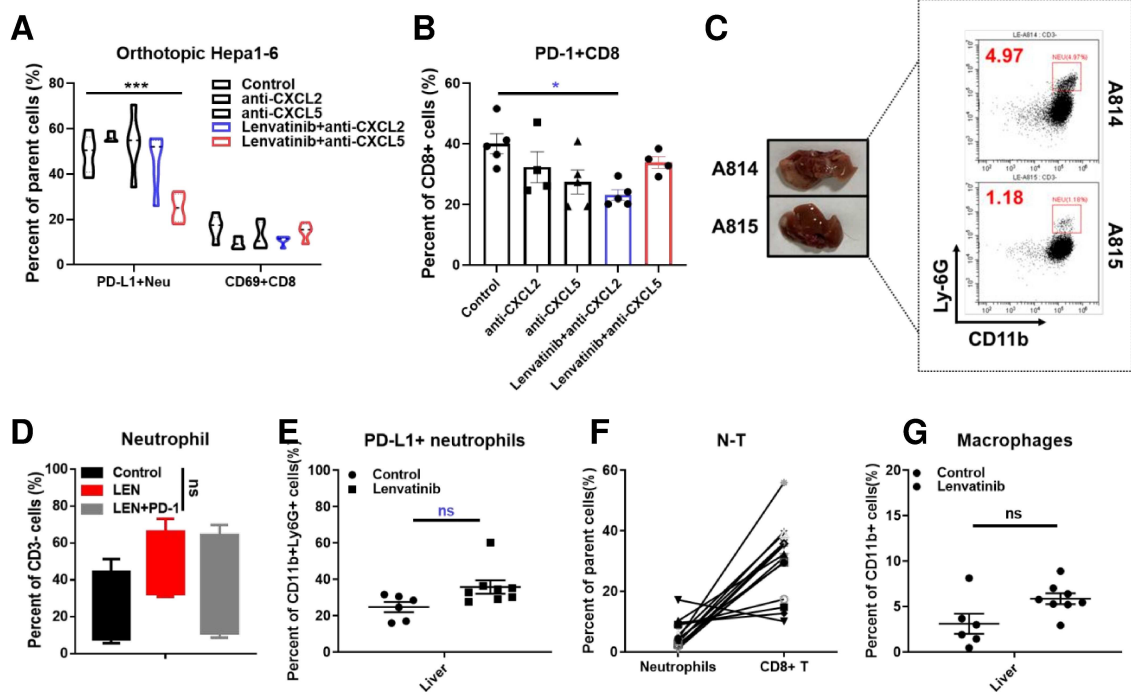

Supplement: jitc-2020-002305supp002.pdf [file jitc-2020-002305supp002.pdf]

**Figure S3****Isolated mouse T cells analysis**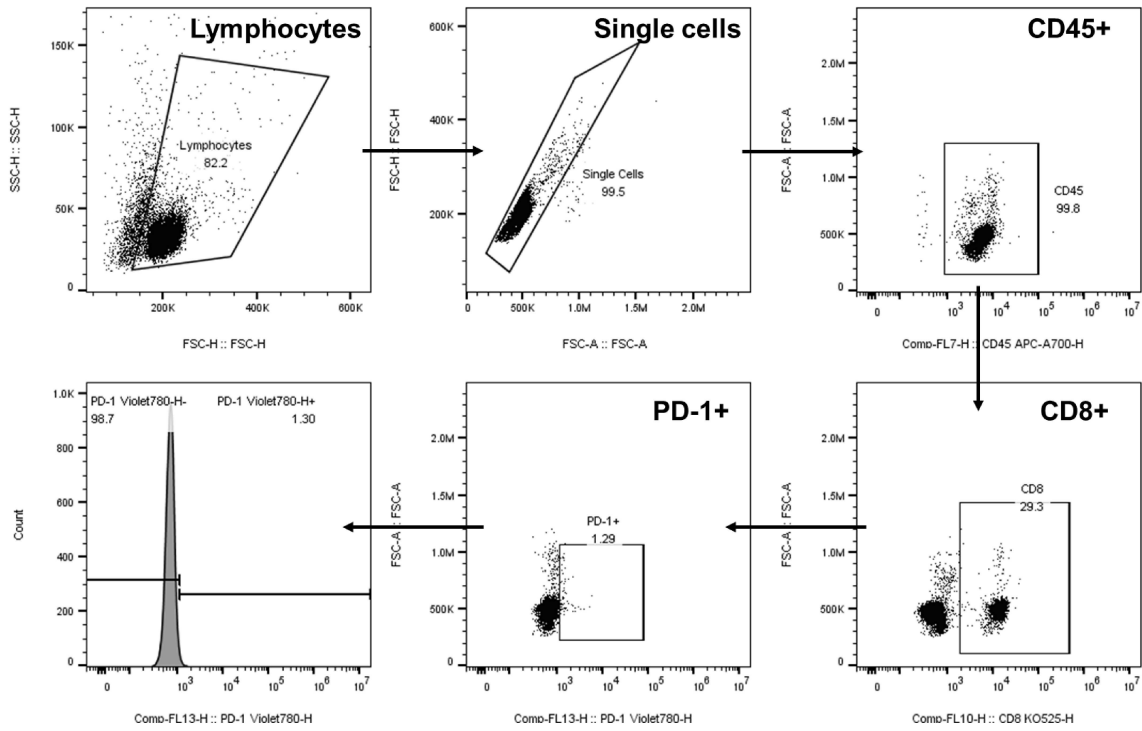

Supplement: jitc-2020-002305supp003.pdf [file jitc-2020-002305supp003.pdf]

# Figure S4

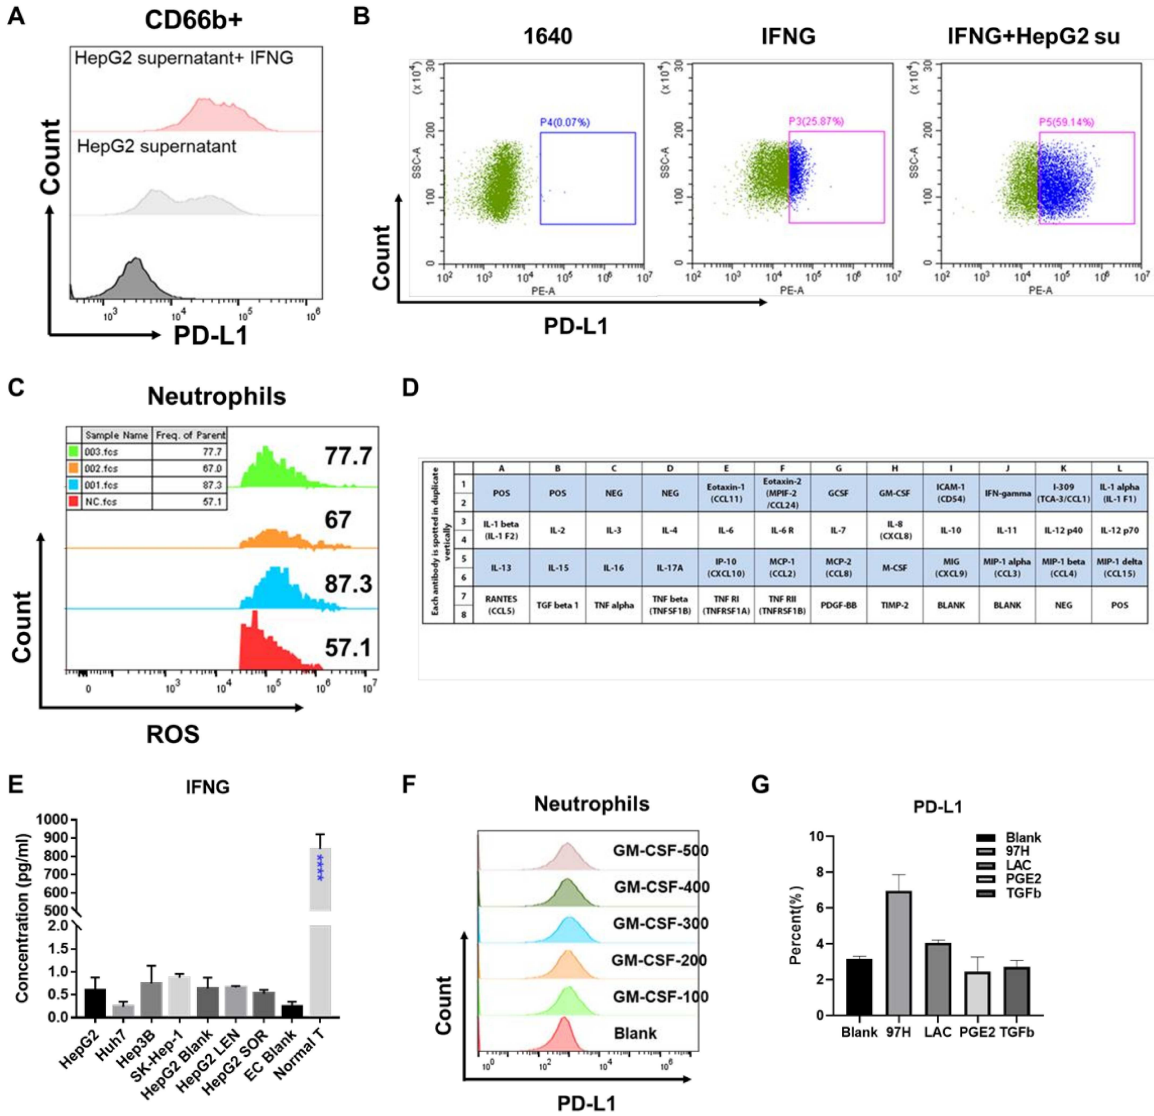

Supplement: jitc-2020-002305supp004.pdf [file jitc-2020-002305supp004.pdf]

## Figure S5

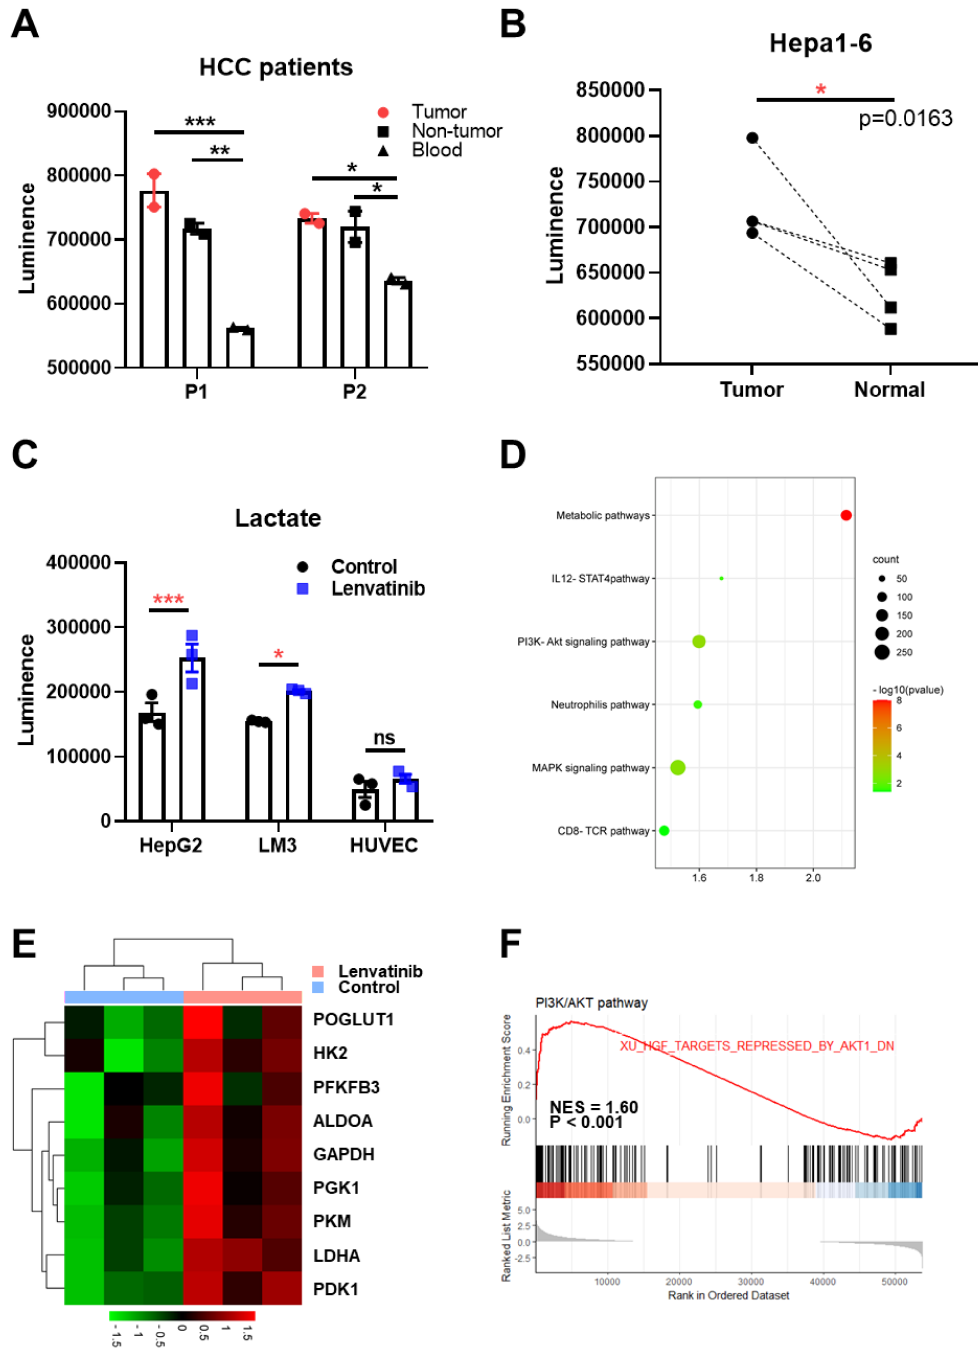

Supplement: jitc-2020-002305supp005.pdf [file jitc-2020-002305supp005.pdf]

## Figure S6

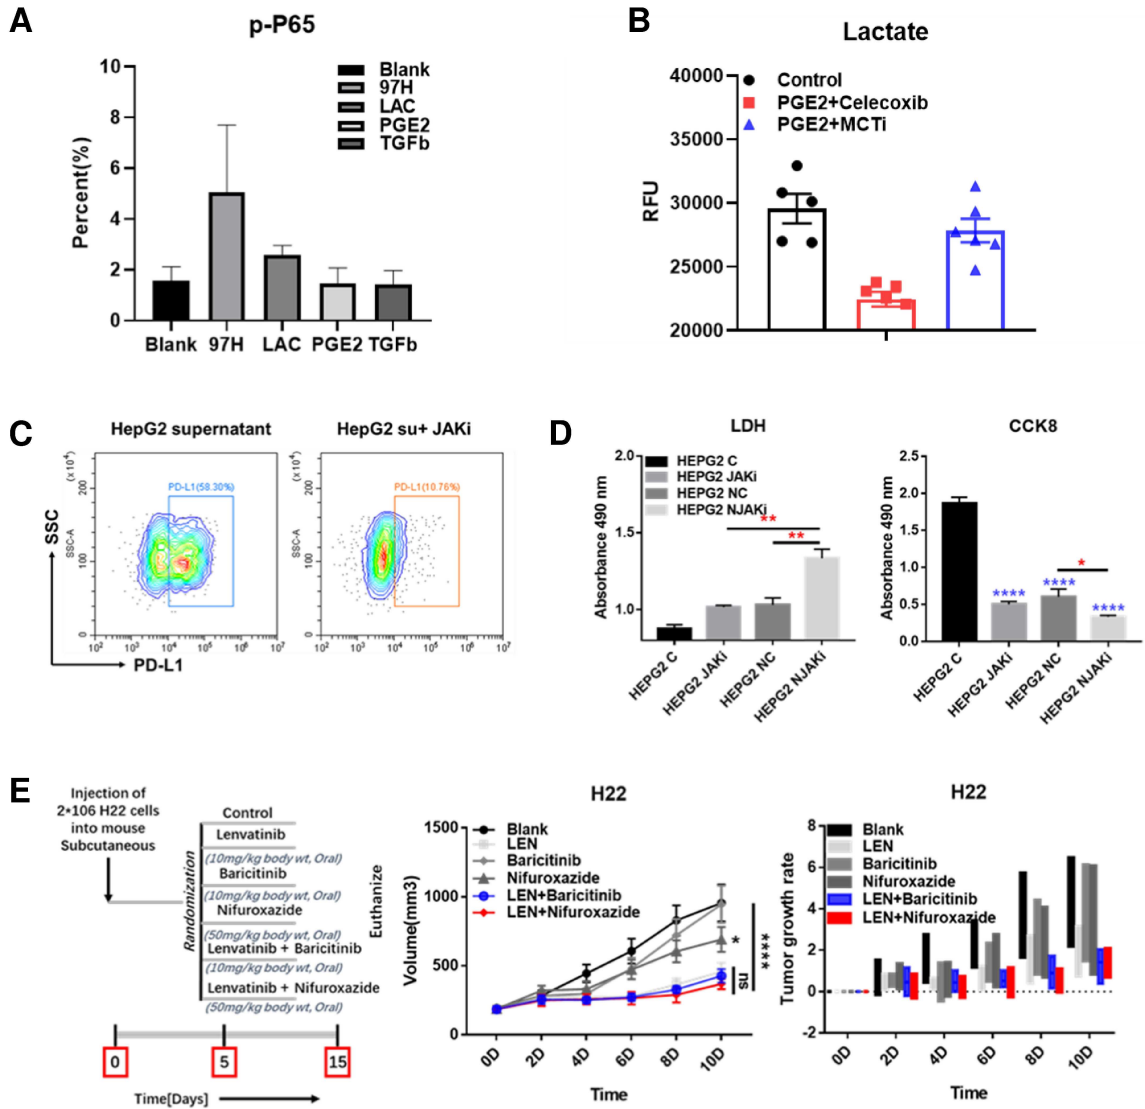

Supplement: jitc-2020-002305supp006.pdf [file jitc-2020-002305supp006.pdf]

# Figure S7

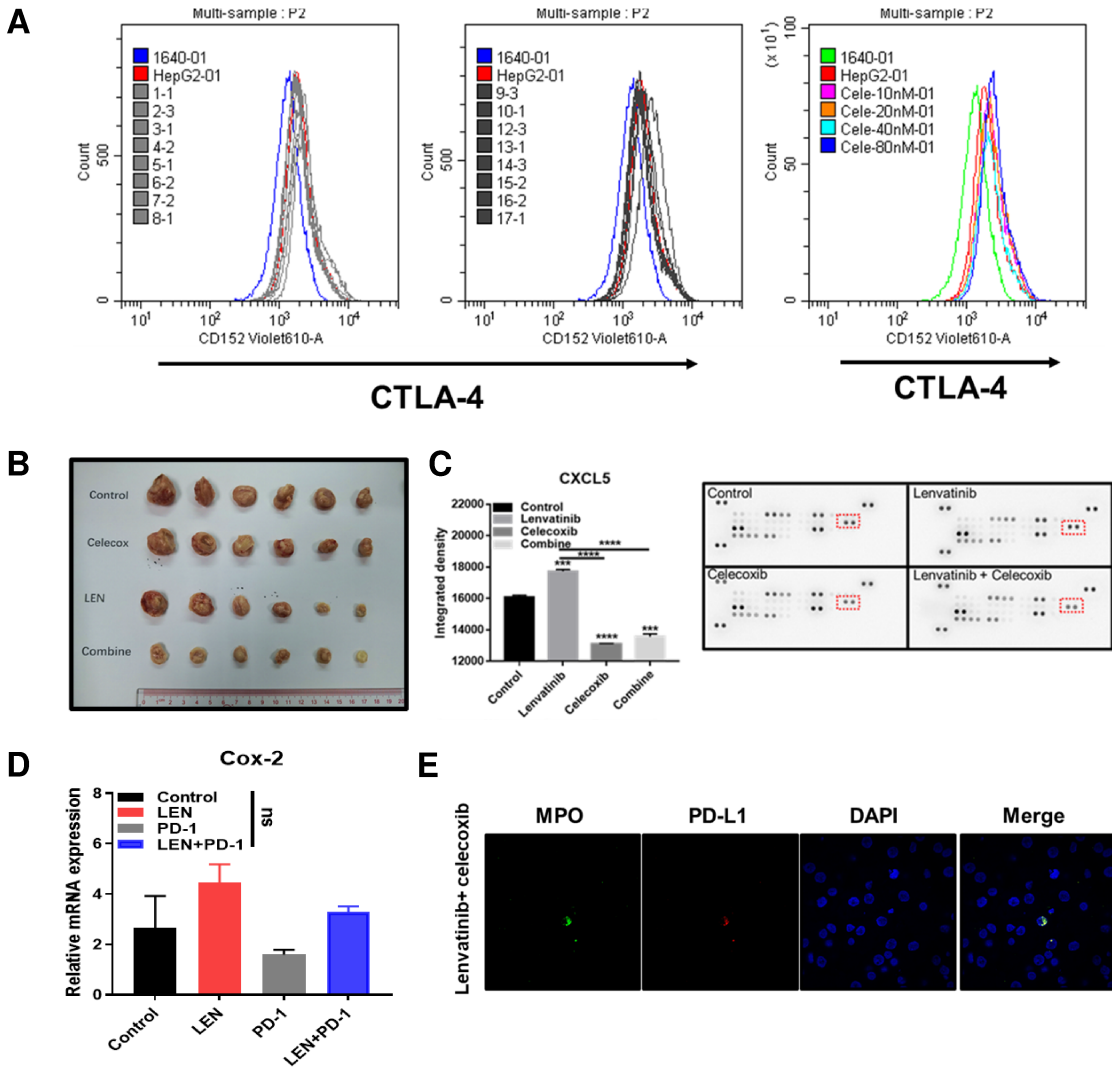

Supplement: jitc-2020-002305supp007.pdf [file jitc-2020-002305supp007.pdf]
